# Supplementary material for: Adapting a Dementia Care Management Intervention for Regional Implementation: A Theory-Based Participatory Barrier Analysis
Source: MDPI journal article supplement (doi:10.3390/ijerph19095478), 2022-04-30
Supplement: s1 [file s1]

**Supplementary Material IV: Observer guide.**

**Date/Time**

**Health care sector**

**Name of the Reviewer/Interviewer**

**Characteristics of the interview** (e.g., during working hours, place, recruitment etc.)

**General remarks on the interview** (e.g., process, disturbances, according to plan etc.)

**Specifics during the interview** (Were there any problems in the realization of the planned procedure?  
What was done differently and why? Were there any open questions that could not be resolved?)
