# Supplementary material for: Adapting a Dementia Care Management Intervention for Regional Implementation: A Theory-Based Participatory Barrier Analysis
Source: Int J Environ Res Public Health. 2022 Apr 30;19(9):5478. doi: 10.3390/ijerph19095478 (PMC9101206; doi:10.3390/ijerph19095478)
Supplement: Supplementary file 1 [file ijerph-19-05478-s001.zip]

Archive with 4 entries (4 files):
- Supplementary Material Table S1_Standards for Reporting Qualitative Research (SRQR) checklist.xlsx
- Supplementary Material Table S2_Overall results of the coding process, separately by barriers and facilitators and assigned to CFIR domains and constructs. 2.xlsx
- Supplementary Materials File S1 Interview guide.pdf
- Supplementary Materials File S2 Observer guide.pdf
