# Supplementary material for: Adapting a Dementia Care Management Intervention for Regional Implementation: A Theory-Based Participatory Barrier Analysis
Source: Int J Environ Res Public Health. 2022 Apr 30;19(9):5478. doi: 10.3390/ijerph19095478 (PMC9101206; doi:10.3390/ijerph19095478)
Supplement: Supplementary file 1 [file ijerph-19-05478-s001.zip › Supplementary Material Table S1_Standards for Reporting Qualitative Research (SRQR) checklist.xlsx]

## Sheet: Tabelle1
Supplementary Material I
Table S1. Standards for Reporting Qualitative Research (SRQR) checklist.
Titel and abstract
Titel	Adapting a Dementia Care Management Intervention for regional implementation: a theory-based participatory barrier analysis
Abstract	Dementia is a leading cause of disability and dependency in older people worldwide. As the number of people affected increases, so does the need for innovative care models. Dementia care management (DCM) is an empirically validated approach to improve care and quality of life for people with dementia (PwD) and caregivers. The aim of this study is to investigate the influencing factors and critica…
Introduction
Problem formulation	The increasing numbers of people with dementia has been identified as a challenge for health care systems worldwide. To tackle this challenge, governments have issued dementia strategies, that more or less specifically target fields of action. In Germany, the comprehensive NDS was adopted in September 2020. One overarching goal was increased action in the development and transfer of evidence-base…
Purpose or research question	The aim of the barrier analysis is to identify intervention- and setting-specific key factors that potentially influence the implementation of DCM in routine care. This analysis integrates the identification and consideration of regional resources and specificities as well as factors that may hinder the implementation efforts within the adaptation process.
Methods
Qualitative approach and research paradigm	The barrier analysis follows a qualitative design and participatory methods were applied. Five local health care experts (four female) from four different health care sectors (an Alzheimer’s society; a local medical network; a care and welfare association; and a hospital) were involved as co-researchers. The barrier analysis was conducted using semi-structured interviews between July and November…
Researcher characteristics and reflexivity	All co-researchers are trained Dementia Care Manager and responsible for the adaption of the DCM standard. Even if they were instructed on the methodology they are not experienced and trained interviewers. They selected the peer reviewers from their professional network. There are different hierarchical relationships between co-researchers as interviewers and peer reviewers as interviewees. In ad…
Context	The study is part of DelpHi-SW. DelpHi-SW aims to test a structured participatory approach to adapting and implementing the original DCM standard to an exemplary local setting. The result of the study will be an implementable site-specific DeCM standard, which will be evaluated in a subsequent study, RoutineDeCM, regarding its ability to be sustainably implemented in routine care.
Sampling strategy	The peer reviewers were selected using purposive sample strategies based on critical discussions during the adaptation phase of the DCM standard. All peer reviewers were recruited by the co-researchers from their network in SW. As the function and responsibility of doctors, nursing and care service providers, palliative care providers, regional networks, hospitals, counseling services, and self-h…
Ethical issues pertaining to human subjects	Ethical review and approval was waived for this study, as all participants involved are co-researchers and not study participants.
Data collection methods	Off a total of 13 interviews, 12 were organized, prepared, and conducted by the co-researchers. One interview was conducted by two academic researchers (KS, JRT) because the co-researchers were too involved in their regular work in inpatient care. All interviews took place in the work context as face-to-face interviews or digital interviews (n = 2). The interviewees participated voluntarily in in…
Data collection instruments and technologies	The interview guide was developed based on the CFIR and the associated online interview guide tool. CFIR constructs that were relevant for the interview guide were identified based on the results of the study thus far and were discussed in the research team. The specific aspects of the adapted DeCM standard (pillars, action fields, foci, and in-terventions) to be discussed were selected made by t…
Units of study	N = 23, 17 female peer reviewers
Data processing and analysis	At the first level of analysis, one academic researcher (KS) assigned all individual text units from all interviews to the CFIR domain and categories according to the CFIR coding criteria [22]. A second researcher independently coded the text units of five randomly chosen interviews using the same CFIR coding scheme. As the intercoder reliability (rH =.70) was below the recommended threshold [23]…
Techniques to enhance trustworthiness	To reach confirmability, all research steps were described in a research diary and then manualised in order to enable a potential audit (e. g. instructions to all research participants, methodological notes, data processing notes, interpretation of the interim results). Both the interview protocols and the subsequent analysis of the data were shared within the academic project team and the catego…
Results/findings
Synthesis and interpretation	The statements of the peer-reviewers regarding barriers to the regional implementation of DeCM were most frequently coded to the CFIR constructs Engaging (24.5% in-cluding according subconstructs; CFIR-domain Process), Patient Needs and Resources (14.9%; CFIR domain Outer Setting), Relative Advantage and Trialability (both 10%; CFIR domain Intervention Characteristics), and Cosmopolitanism (8.8%;…
Links to empirical data	For data protection reasons, no raw data can be made available, as it is highly likely that conclusions can be drawn about the individual peer reviewers from this data.
Discussion
Integration with prior work, implications, transferability, and contribution(s) to the field	Our study provides concrete indications of possible critical determinants of the future transfer of the evidence-based DCM standard into health care practice in Germany. We have shown that the implementation process benefits from a comprehensive participatory approach. As academic researchers, we received strategic, site-specific information on possible barriers to the implementation strategy. Mo…
Limitations	Our design approach is in line with the requirements of qualitative research. Through purposive sampling, relevant stakeholders from the main health sectors could be identified. Additionally, our sample depicts both hierarchical and gender-related characteristics of the care landscape. This enabled us to gain detailed and action-guiding insights into inhibiting and beneficial circumstances for th…
Other
Conflicts of interest	The authors declare no conflict of interest. The funders had no role in the design of the study; in the collection, analyses, or interpretation of data; in the writing of the manuscript, or in the decision to publish the results.
Funding	This research was funded by Federal Ministry of Culture and Science of the State of North Rhine-Westphalia, Zukunftsfonds 2019, AZ 224-1.08.01.04.
CFIR Consolidated Framework for Implementation Research; DCM Dementia Care Management; DeCM adapted Dementia Care Management; DelpHI-SW Dementia: life- and person-centered help in Siegen-Wittgenstein; GPs General Practioner; NDS National Dementia Strategy; PwD People with Dementia
Note. Adapted to Standards for reporting qualitative research: a synthesis of recommendations (pp. 1247–1248) by O'Brien, B.C.; Harris, I.B.; Beckman, T.J.; Reed, D.A.; Cook, D.A. in Academic medicine: journal of the Association of American Medical Colleges 2014, 89, pp. 1245–1251. DOI: 10.1097/ACM.0000000000000388.
