# Supplementary material for: Adapting a Dementia Care Management Intervention for Regional Implementation: A Theory-Based Participatory Barrier Analysis
Source: Int J Environ Res Public Health. 2022 Apr 30;19(9):5478. doi: 10.3390/ijerph19095478 (PMC9101206; doi:10.3390/ijerph19095478)
Supplement: Supplementary file 1 [file ijerph-19-05478-s001.zip › Supplementary Material Table S2_Overall results of the coding process, separately by barriers and facilitators and assigned to CFIR domains and constructs. 2.xlsx]

## Sheet: Tabelle1
Supplementary Material II
Table S2. Overall results of the coding process, separately by barriers and facilitators and assigned to CFIR domains and constructs.
Barriers (n = 249)				Facilitators (n = 169)
CFIR construct*	n	% **		CFIR construct*	n	%**
I. Intervention Characteristics	78	31.3		I. Intervention Characteristics	46	27.2
Relative Advantage	25	10		Evidence Strength and Quality	1	0.6
Adaptability	13	5.2		Relative Advantage	34	20.1
Trialability	25	10		Adaptability	1	0.6
Complexity	12	4.8		Trialability	7	4.1
Cost	3	1.2		Complexity	3	1.8
II. Outer Setting	73	29.3		II. Outer Setting	56	33.1
Patient Needs and Resources	37	14.9		Patient Needs and Resources	42	24.9
Cosmopolitanism	22	8.8		Cosmopolitanism	10	5.9
Peer Pressure	7	2.8		Peer Pressure	3	1.8
External Policies and Incentives	7	2.8		External Policies and Incentives	1	0.6
III. Inner Setting	32	12.9		III. Inner Setting	55	32.5
Structural Characteristics	2	0.8		Structural Characteristics	1	0.6
Networks and Communications	5	2		Networks and Communications	2	1.2
Implementation Climate	2	6		Culture	5	3
Tension for Change	7			Implementation Climate	6	19.5
Compatibility	6			Tension for Change	11
Readiness for Implementation	2	4		Compatibility	16
Leadership Engagement	1			Readiness for Implementation	5	8.3
Available Resources	7			Leadership Engagement	1
IV. Characteristics of Individuals	5	2		Available Resources	7
Knowledge and Beliefs about the Intervention	5	2		Access to Knowledge and Information	1
V. Process	61	24.5		IV. Characteristics of Individuals	6	3.6
Engaging	42	24.5		Knowledge and Beliefs about the Intervention	6	3.6
Opinion Leaders	1			V. Process	6	3.6
Formally Appointed Internal Implementation Leaders	1			Engaging	2	3.6
Champions	15			Formally Appointed Internal Implementation Leaders	1
External Change Agents	2			Champions	3
CFIR Consolidated Framework for Implementation Research
* Only CFIR constructs that have also been used to code text units are listed in the table.
** The proportion of CFIR constructs and their subconstructs in all barriers or facilitators.
